# Supplementary material for: Identification, Sequencing, and Molecular Analysis of RNA2 of Artichoke Italian Latent Virus Isolates from Known Hosts and a New Host Plant Species
Source: MDPI journal article supplement (doi:10.3390/v15112170), 2023-10-28
Supplement: s1 [file s1]

**Supplementary Table S1.** List of primers used in 5'- and 3'-RACE and RT-PCR assays for amplifying and subsequent sequencing of genomic RNA2 of AILV isolates. V: degenerate nucleotide with A\C\G.

| Primers        | Sequence (5'-3')       | Position   | Amplicons size (bp) |
|----------------|------------------------|------------|---------------------|
| <b>F1s</b>     | AAATTGGATATGGACCTCAAG  | 915- 935   | 330                 |
| <b>F1a</b>     | ATTCGGCTACTTCTAGCAATT  | 1244- 1224 |                     |
| <b>F2s</b>     | GAAAAGGTTTTGACCTATCCT  | 3301- 3321 | 420                 |
| <b>F2a</b>     | ACTCAATGGCATAATCCAAAA  | 3720- 3700 |                     |
| <b>RACE-a</b>  | AAATATAAAAGCCAAACAAA   | 259- 239   | 260                 |
| <b>1-s</b>     | GAAAAGAAATTTTCAAAAACCT | 1-22       | 1533                |
| <b>2-a</b>     | TTCATCCTCCAACCTGGTCAA  | 1533- 1514 |                     |
| <b>2-s</b>     | AACCCCCGCGGTCTGTTCACC  | 1458- 1479 | 1673                |
| <b>3-a</b>     | TGGCCCCCTTCTCTGTGGAAA  | 3152- 3132 |                     |
| <b>3-s</b>     | CGGATGTTACCACAACTGTGG  | 3036- 3056 | 1594                |
| <b>oligodT</b> | TTTTTTTTTTTTTTTTTTTV   | 4630       |                     |
